# Supplementary material
Source: Springer Nature journal article supplement (https://www.springermedizin.de/resource/supplementary/12911_2011_538_MOESM2_ESM.pdf/9526104)
Supplement: MOESM2 [file 9526104]

**A**

|                                     |             | $\gamma$ -GTP (IU/L) |                  |
|-------------------------------------|-------------|----------------------|------------------|
|                                     |             | < 26.93              | $\geq$ 26.93     |
| WBC ( $\times 10^3$ cells/ $\mu$ L) | < 5.83      | 9 / 47<br>(-1.22)    | 6 / 7<br>(-0.41) |
|                                     | $\geq$ 5.83 | 12 / 22<br>(-0.32)   | 18 / 3<br>(1.07) |

**Case/Healthy control**

**B**

|                                     |             | $\gamma$ -GTP (IU/L) |                      |
|-------------------------------------|-------------|----------------------|----------------------|
|                                     |             | < 30.24              | $\geq$ 30.24         |
| WBC ( $\times 10^3$ cells/ $\mu$ L) | < 6.64      | 300 / 990<br>(-1.31) | 731 / 509<br>(-0.02) |
|                                     | $\geq$ 6.64 | 298 / 427<br>(-0.68) | 867 / 270<br>(1.08)  |

**Case/Healthy control**
